# Supplementary material for: Assessment of coupled Zn concentration and natural stable isotope analyses of urine as a novel probe of Zn status
Source: Royal Society of Chemistry journal article supplement (doi:10.1039/c9mt00160c), 2019-08-09
Supplement: c9mt00160c1.xlsx [file c9mt00160c1.xlsx]

## Sheet: Read_Me
Supplementary Information
For:
Authors: Rebekah E. T. Moore, Mark Rehkämper, Wolfgang Maret, Fiona Larner

## Sheet: Table S1
Quality control isotope results
		δ66/64ZnJMC-Lyon (‰)
	n	This study			Reference*
London Zn (no AEC)	7	0.1	±	0.08	0.1	±	0.07
London Zn (AEC)	4	0.15	±	0.02	0.1	±	0.07
Seronorm Trace Elements Urine L-1	11	0.24	±	0.09	0.25	±	0.03
ERM-BB184 Bovine Muscle	8	0.15	±	0.1	0.07	±	0.08

## Sheet: Table S2
All urine Zn data
Participant	Sample	Gender	Diet	SG	[Zn]raw	[Zn]SG	δ66/64Zn
					ng ml-1	ng ml-1	‰
1	1.1	F	Omnivore	1.0135	443.531	657.083	0.42
1	1.2	F	Omnivore	1.015	362.913	483.885	0.35
1	1.3	F	Omnivore	1.0125	247.898	396.637	0.35
1	1.4	F	Omnivore	1.0235	463.932	394.836	0.44
1	2.2	F	Omnivore	1.022	568.791	517.083	0.336759
1	2.4	F	Omnivore	1.0115	216.997	377.386	0.35
2	1.1	F	No Meat	1.02	339.6	339.6	0.51
2	1.2	F	No Meat	1.0105	124.835	237.781	0.66
2	1.3	F	No Meat	1.004	24.2357	121.179	0.84
2	2.1	F	No Meat	1.022	383.851	348.956	0.65
2	2.2	F	No Meat	1.017	81.4458	95.8186	1.09
2	2.3	F	No Meat	1.01	32.9619	65.9238	0.85
3	1.1	F	No Meat	1.01	117.668	235.337	1.01
3	1.2	F	No Meat	1.0055	78.6763	286.096	1.1
3	1.3	F	No Meat	1.0045	16.0439	71.306	0.46
3	1.5	F	No Meat	1.01	186.647	373.294	1.42
4	1.1	F	Omnivore	1.03	413.52	275.68	1.13
4	1.2	F	Omnivore	1.0275	379.786	276.208	0.62
4	1.3	F	Omnivore	1.005	33.9356	135.742	0.69
4	1.4	F	Omnivore	1.016	95.7528	119.691	0.83
4	2.1	F	Omnivore	1.013	132.508	203.859	0.86
4	2.2	F	Omnivore	1.01	118.027	236.053	0.66
4	2.3	F	Omnivore	1.012	26.2401	43.7334	0.61
4	2.4	F	Omnivore	1.012	149.488	249.147	0.72
4	2.5	F	Omnivore	1.018	280.389	311.543	0.69
5	1.1	F	No Meat, No Dairy	1.012	54.7735	91.2891	0.92
5	1.2	F	No Meat, No Dairy	1.0135	38.5923	85.7607	1.11
5	1.4	F	No Meat, No Dairy	1.009	31.3444	52.2407	0.79
6	1.1	F	No Dairy	1.029	350.174	241.5	0.42
6	1.2	F	No Dairy	1.012	68.1464	113.577	0.62
6	1.3	F	No Dairy	1.019	82.7043	87.0572	0.63
6	1.4	F	No Dairy	1.0245	147.735	120.6	0.63
6	2.1	F	No Dairy	1.0215	204.189	189.943	0.64
6	2.2	F	No Dairy	1.005	57.3761	229.504	0.5
6	2.3	F	No Dairy	1.0175	59.8207	68.3665	0.72
6	2.4	F	No Dairy	1.028	142.423	101.731	0.65
7	1.1	M	Omnivore	1.029	520.789	359.165	0.5
7	1.2	M	Omnivore	1.0175	512.061	585.213	0.36
7	1.3	M	Omnivore	1.03	392.625	261.75	0.49
7	1.4	M	Omnivore	1.028	282.115	201.511	0.64
7	2.2	M	Omnivore	1.0045	68.7769	305.675	0.5
7	2.3	M	Omnivore	1.008	64.0769	160	0.65
7	2.4	M	Omnivore	1.016	176.304	220.379	0.44
7	2.5	M	Omnivore	1.015	184.17	245.559	0.61
8	1.1	M	Omnivore	1.0155	449.466	579.956	0.39
8	1.2	M	Omnivore	1.0215	701.489	652.548	0.25
8	1.3	M	Omnivore	1.0055	92.9114	337.86	0.42
8	1.4	M	Omnivore	1.0055	82.8371	301.226	0.56
9	1.1	M	Omnivore	1.023	1722.49	1497.81	0.11
9	1.2	M	Omnivore	1.031	2059.67	1328.82	0.19
9	1.3	M	Omnivore	1.0355	1398.62	787.956	0.18
9	1.4	M	Omnivore	1.01	137.225	274.45	0.34
9	2.1	M	Omnivore	1.0205	330.704	322.638	0.18
9	2.2	M	Omnivore	1.0065	102.945	316.754	0.420468
9	2.3	M	Omnivore	1.02	197.935	197.935	0.447236
10	1.1	M	No Meat	1.01	250.206	500.413	0.44
10	1.2	M	No Meat	1.009	144.729	321.62	0.79
10	1.3	M	No Meat	1.0085	138.901	326.825	0.53
10	1.4	M	No Meat	1.0115	203.106	353.227	0.58
10	1.5	M	No Meat	1.006	169.682	565.608	0.54

## Sheet: Table S3
Individual urine means
Participant	Gender	Diet	n	ZnRaw			ZnSG-norm			δ66/64Zn
				ng ml-1			ng ml-1			‰
1	F	Omnivore	6	384.01	±	106.781	471.151	±	106.781	0.37446	±	0.043785
2	F	No Meat	6	164.488	±	125.006	201.543	±	125.006	0.766667	±	0.20383
3	F	No Meat	4	99.7589	±	126.968	240.323	±	129.091	1	±	0.399197
4	F	Omnivore	9	181.072	±	88.3236	207.369	±	89.8965	0.756667	±	0.164012
5	F	No Meat, No Dairy	3	39.7065	±	16.9077	96.4271	±	26.5089	0.94	±	0.160935
6	F	No Dairy	8	139.071	±	66.709	143.145	±	67.6189	0.60125	±	0.0949342
7	M	Omnivore	8	275.115	±	133.355	308.853	±	134.07	0.505714	±	0.0955436
8	M	Omnivore	4	331.676	±	174.492	467.897	±	174.492	0.405	±	0.127148
9	M	Omnivore	7	849.941	±	541.263	671.453	±	544.189	0.266815	±	0.133593
10	M	No Meat	5	181.325	±	112.114	413.538	±	112.114	0.576	±	0.130115
